# Supplementary material
Source: MDPI journal article supplement (https://www.mdpi.com/2073-445X/11/7/1073)
Supplement: s1 [file s1]

**Table S1.** Samples of litchi and longan orchards.

| County   | Orchard names                                           | Location                                                        | Orchard types     |
|----------|---------------------------------------------------------|-----------------------------------------------------------------|-------------------|
| Longmen  | Feifang cooperative                                     | Gankeng Village et al., Longjiang Town                          | Longan            |
|          | Bainian litchi orchard                                  |                                                                 | Litchi and longan |
|          | Lizhishengtaiyuan orchard                               | Niuwei Village, Pingling Town                                   | Litchi and longan |
| Boluo    | Haiying cooperative                                     | Jinziling Village, Luoyang Town                                 | Litchi and longan |
|          | Lichunying litchi orchard                               | Meihua Village, Luoyang Town                                    | Litchi            |
|          | Dongpo litchi orchard                                   | Shanqian Village, Longhua Town                                  | Litchi            |
|          | Shanqian cooperative                                    | Liucun Village, Longhua Town                                    | Litchi            |
|          | Anduo orchard                                           | Liantang Village, Huzhen Town                                   | Litchi and longan |
|          | Litchi Longan Science and Technology Demonstration Park | Xiacun Village, Huzhen Town                                     | Litchi            |
|          | Leigongxiangshan cooperative                            | Leigong Village, Taimei Town                                    | Litchi            |
|          | Liantang cooperative                                    | Wutang Village, Guanying Town                                   | Litchi            |
|          | Gushu litchi orchard                                    | Nanxi Village, Xikou Village and Jiezi Village, Gongzhuang Town | Litchi and longan |
|          | Huihuang cooperative                                    | Nanxi Village, Gongzhuang Town                                  | Litchi and longan |
| Huicheng | Xikeng orchard                                          | Huihuan Avenue                                                  | Litchi and longan |
|          | Dayaochi orchard                                        | Huangdong Village, Huizhou West Railway Station                 | Litchi and longan |
|          | Linong cooperative                                      | Lilin Town, Zhongkai High-tech Zone                             | Litchi            |
|          | Fenghua orchard                                         | Dongjiang Village, Chenjiang Street                             | Litchi and longan |
| Huiyang  | Huida cooperative                                       | Shandiinggaomian Village, Zhenlong Town                         | Litchi and longan |
|          | Jinli cooperative                                       | Huangdong Village, Zhenlong Town                                | Litchi and longan |
|          | Lishilizhilongyan orchard                               | Huangdong Village, Zhenlong Town                                | Litchi and longan |
|          | Potangjiao cooperative                                  | Potangjiao Village, Zhenlong Town                               | Litchi            |
|          | Louzhai cooperative                                     | Beilouzhai Village, Zhenlong Town                               | Litchi and longan |
|          | Jinhuinong cooperative                                  | Changlong Village, Zhenlong Town                                | Litchi and longan |
| Huidong  | Lilong cooperative                                      | Tantang Village, Baihua Town                                    | Litchi and longan |
|          | Sijixiansouwang orchard                                 | Shouwang Village, Duozechu Town                                 | Litchi and longan |
|          | Lvsegaokejishiyefazhang Co., Ltd.                       | Datian Village, Duozechu Town                                   | Litchi and longan |
|          | Qianxin orchard                                         | Qiaoxin Village, Daling Town                                    | Litchi and longan |

|                                  |                                                |                   |
|----------------------------------|------------------------------------------------|-------------------|
| Jiaxinshuiguo Co., Ltd.          | Xiaohedong Village, Lianghua Town              | Litchi and longan |
| Xunliaoguanshan orchard          | Chisha Village, Xunliao Coastal Tourism Resort | Litchi and longan |
| Niannianhong lizhikeji Co., Ltd. | Tianwu Village, Baihua Town                    | Litchi            |
| Jiulongfengshengli cooperative   | Xialian Village, Pingshan Town                 | Litchi and longan |
| Guangxian cooperative            | Fanhe Village, Renshan Town                    | Litchi and longan |
| Qiliang cooperative              | Heng She Village, Western Daya Bay             | Litchi and longan |
| Lizhiyuan cooperative            | Heng She Village, Western Daya Bay             | Litchi and longan |

**Table S2.** Main pollinators species of litchi and longan.

| Classification |               | Species                                    | Amount (Head) | Proportion | Nesting preference | Body length (mm) |
|----------------|---------------|--------------------------------------------|---------------|------------|--------------------|------------------|
| Order          | Family        |                                            |               |            |                    |                  |
| Hymenoptera    | Apidae        | Apis cerana Fabricius (farmed)             | 174           | 0.696      | Hive               | 12               |
|                |               | Apis cerana Fabricius (wild)               | 19            | 0.076      | Cave               | 12               |
|                | Halictidae    | Bombus                                     | 13            | 0.052      | Cave               | 20               |
|                |               | Ceratina cognata                           | 6             | 0.024      | Shaft              | 9                |
|                |               | Amegilla zonata                            | 5             | 0.020      | Ground             | 13               |
|                |               | Halictus sp.                               | 4             | 0.016      | Ground             | 8                |
|                | Pompilidae    | Auplopus sp.                               | 1             | 0.004      | Ground             | 17               |
|                | Vespidae      | Polistes (Gyrostoma) tenebrosus Lepeletier | 1             | 0.004      |                    |                  |
|                |               | Polistes gigas (Kirby)                     | 1             | 0.004      |                    |                  |
|                | Ropalidia     | Ropalidia hongkongensis                    | 2             | 0.008      |                    |                  |
| Diptera        | Parapolybia   | Parapolybia nodosa van der Vecht           | 1             | 0.004      |                    |                  |
|                | Syrphidae     | Sphinx morphasp                            | 2             | 0.008      |                    |                  |
|                |               | Episyrphus balteatus De Geer               | 4             | 0.016      |                    |                  |
|                | Calliphoridae | Stomoxys calcitrans                        | 6             | 0.024      |                    |                  |
|                |               | Chrysomya sp.                              | 8             | 0.032      |                    |                  |
|                | Anthomyiidae  | Anthomyia illocata Walker                  | 4             | 0.016      |                    |                  |





Table S4. Richness of pollinators in land-use types.

| Num. | Land-use types Code             | Tag | Type and number of pollinators                                                                                                                                               | Sum | Cave | Ground | Shaft | Parasitic / predatory natural enemies | Pest |
|------|---------------------------------|-----|------------------------------------------------------------------------------------------------------------------------------------------------------------------------------|-----|------|--------|-------|---------------------------------------|------|
| 1    | Litchi orchard 1                | i1  | Goryphusbasilaris Holmgren,1868, 1♀                                                                                                                                          | 1   |      |        |       | 1                                     |      |
| 2    | Litchi orchard 2                | i2  | Auplopus sp,1♀                                                                                                                                                               | 1   |      | 1      |       |                                       |      |
| 3    | Longan orchard 1                | o1  | Evaniaappendigaster (L.) ,1♀; Halictus sp1,2♀; MegachilerixatorCockerell, 1♀; Apodynrus sp,1♀; Tiphiamalayan,1♀                                                              | 6   | 1    | 2      | 1     | 2                                     |      |
| 4    | Longan orchard 2                | o2  | Goryphusbasilaris, 1♀                                                                                                                                                        | 1   |      |        |       | 1                                     |      |
| 5    | Road1                           | d1  | Tenthredinidae, 1♀; Episyronrufotibialis Tsuneki,1♀; Halictussp, 1♀                                                                                                          | 3   |      | 2      |       |                                       | 1    |
| 6    | Road 2                          | d2  | Halictussp, 1♀                                                                                                                                                               | 1   |      | 1      |       |                                       |      |
| 7    | Field margin 1                  | t1  | ApisceranaFabricius, 1♀; Halictussp, 2♀; Pison sp,1♂                                                                                                                         | 4   | 1    | 3      |       |                                       |      |
| 8    | Field margin 2                  | t2  | Goryphusbasilaris, 1♀; Apiscerana, 1♀; Stendynerus sp,1♀;                                                                                                                    | 3   | 1    |        |       | 2                                     |      |
| 9    | Railway1                        | n1  | Ceratina cognata,1♀                                                                                                                                                          | 1   |      |        | 1     |                                       |      |
| 10   | Railway 2                       | n2  | Stendynerus sp,1♀; Halictussp, 1♀                                                                                                                                            | 2   |      | 1      |       | 1                                     |      |
| 11   | Vegetable field 1               | c1  | Apiscerana, 1♀                                                                                                                                                               | 1   | 1    |        |       |                                       |      |
| 12   | Vegetable field 2               | c2  | Larracarbonaria (Smith, 1858),1♀                                                                                                                                             | 1   |      | 1      |       |                                       |      |
| 13   | Grassland 1                     | hc1 | Apiscerana, 1♀                                                                                                                                                               | 1   | 1    |        |       |                                       |      |
| 14   | Grassland 2                     | hc2 | Apiscerana, 2♀; Halictus sp, 1♀                                                                                                                                              | 3   | 2    | 1      |       |                                       |      |
| 15   | Orange orchard                  | lz  | Goryphus sp.,1♀; Ropalidiarufocollaris (Cameron) , 1♀; Halictussp p (two kinds) , 2♀                                                                                         | 4   | 1    | 2      |       | 1                                     |      |
| 16   | Clausena lansium (Lour.) Skeels | hp  | Astomaspis sp,1♀; Halictus sp1,2♀                                                                                                                                            | 3   |      | 2      |       | 1                                     |      |
| 17   | Planted forest 1                | r1  | Halictus sp2 (Different from the previous species) ,3♀; Ceratina cognata,1♀; Aglaojoppa sp,1♀; Ischnussp, 1♀; Sceliphrondeformedeforme (Smith), 1♀; Bombusexi mius Smith, 1♀ | 8   | 1    | 4      | 1     | 2                                     |      |

|    |                             |    |                                                                                                                                                                                                                                                                                                                                                                                                                                                                                                                                                                         |    |   |   |   |   |
|----|-----------------------------|----|-------------------------------------------------------------------------------------------------------------------------------------------------------------------------------------------------------------------------------------------------------------------------------------------------------------------------------------------------------------------------------------------------------------------------------------------------------------------------------------------------------------------------------------------------------------------------|----|---|---|---|---|
| 18 | Planted forest 2            | r2 | Evania appendigaster,1♀;<br>Halictus sp1,1♀; Halictus<br>sp2,1♀; Amegillazonata<br>(L.),1♀; Ceratina<br>cognata,1♀; Bombuseximi<br>us Smith,2♀<br>Ropalidia<br>hongkongensis,1♀; Poliste<br>stenebricosus, 1♀;<br>Episyronarrogans<br>Smith,2♀; Polistesjaponic<br>us Saussure, 1♀;<br>Aptesissp, 1♀; Ceratina<br>cognata,1♀;<br>Evania<br>appendigaster,1♀1♂;<br>Ichneumon<br>sp,1♂; Epyrissp, 1♀; A<br>uplopus sp,1♂;<br>Episyronarrogans<br>Smith,1♀; Bembecinus<br>sp,1♀; Tenthredinidae, 1<br>♀; Halictusspp (three<br>kinds) , 5♀;<br>Bombuseximius Smith,<br>2♀; | 7  | 2 | 3 | 1 | 1 |
| 19 | Natural forest 1            | z1 | Episyronarrogans<br>Smith,2♀; Polistesjaponic<br>us Saussure, 1♀;<br>Aptesissp, 1♀; Ceratina<br>cognata,1♀;<br>Evania<br>appendigaster,1♀1♂;<br>Ichneumon<br>sp,1♂; Epyrissp, 1♀; A<br>uplopus sp,1♂;<br>Episyronarrogans<br>Smith,1♀; Bembecinus<br>sp,1♀; Tenthredinidae, 1<br>♀; Halictusspp (three<br>kinds) , 5♀;<br>Bombuseximius Smith,<br>2♀;                                                                                                                                                                                                                   | 7  | 3 | 1 | 1 | 2 |
| 20 | Natural forest 2            | z2 | Episyronarrogans<br>Smith,1♀; Bembecinus<br>sp,1♀; Tenthredinidae, 1<br>♀; Halictusspp (three<br>kinds) , 5♀;<br>Bombuseximius Smith,<br>2♀;                                                                                                                                                                                                                                                                                                                                                                                                                            | 14 | 3 | 7 | 3 | 1 |
| 21 | Rural residential<br>area 1 | j1 | — —                                                                                                                                                                                                                                                                                                                                                                                                                                                                                                                                                                     | 0  |   |   |   |   |
| 22 | Rural residential<br>area 2 | j2 | — —                                                                                                                                                                                                                                                                                                                                                                                                                                                                                                                                                                     | 0  |   |   |   |   |

**Table S5.** Biophysical parameters and relative abundance of wild bees in Huizhou, 2015-2019.

| Species name          | Seasonal activity | Foraging distance(m) | Relative abundance |
|-----------------------|-------------------|----------------------|--------------------|
| Apis cerana Fabricius | 1                 | 424                  | 0.402              |
| Bombus                | 0.7               | 861.52               | 0.276              |
| Ceratina cognata      | 0.7               | 259.93               | 0.065              |
| Amegillazonata        | 0.8               | 478.69               | 0.126              |
| Halictus sp           | 0.8               | 205.24               | 0.107              |
| Auplopus sp           | 0.6               | 697.45               | 0.023              |

**Table S6.** Nested suitability and availability of nectar-pollen plant resources of the land-use types in Huizhou, 2015-2019.

| Land-use types               | Cave | Ground | Shaft | Nectar-pollen plant resources in litchi and longan<br>flowering period |
|------------------------------|------|--------|-------|------------------------------------------------------------------------|
| Grassland                    | 0.97 | 0.26   | 0     | 0.0285                                                                 |
| Rainfed cropland             | 0.32 | 0.26   | 0     | 0.0434                                                                 |
| Construction land            | 0    | 0      | 0     | 0                                                                      |
| Water bodies                 | 0    | 0      | 0     | 0                                                                      |
| Irrigated cropland           | 0    | 0      | 0     | 0                                                                      |
| Unutilized land              | 0    | 0      | 0     | 0                                                                      |
| Forest land                  | 0.93 | 0.98   | 0.81  | 0.1311                                                                 |
| Litchi and longan's orchards | 0.16 | 0.38   | 0.36  | 0.6464                                                                 |
